## Short Report

### **Negative regulation of uPAR activity by a GPI-specific phospholipase C**

Michiel van Veen<sup>1</sup>, Elisa Matas-Rico<sup>1</sup>, Koen van de Wetering<sup>2,5</sup>, Daniela Leyton-Puig<sup>1</sup>, Katarzyna M. Kedziora<sup>1,6</sup>, Nicolai Sidenius<sup>4</sup>, Kees Jalink<sup>1</sup>, Anastassis Perrakis<sup>3</sup>, Wouter H. Moolenaar<sup>1\*</sup>

<sup>1</sup> Division of Cell Biology, <sup>2</sup> Division of Molecular Oncology, <sup>3</sup> Division of Biochemistry, The Netherlands Cancer Institute, Plesmanlaan 121, Amsterdam, The Netherlands

<sup>4</sup> IFOM, The FIRC Institute of Molecular Oncology, Milan, Italy

<sup>5</sup> Present address: Department of Dermatology and Cutaneous Biology, Sidney Kimmel Medical College at Thomas Jefferson University, Philadelphia, PA, USA

<sup>6</sup> Present address: University of North Carolina, Chapel Hill Genetic Medicine Building, Chapel Hill, NC, USA

\*Corresponding author, E-mail: [w.moolenaar@nki.nl](mailto:w.moolenaar@nki.nl)

## 1 **Abstract**

2 The urokinase receptor (uPAR) is a glycosylphosphatidylinositol (GPI)-anchored protein that  
3 promotes tissue remodeling, tumor cell adhesion, migration and invasion. uPAR mediates  
4 degradation of the extracellular matrix through protease recruitment and enhances cell  
5 adhesion, migration and signaling through vitronectin binding and interactions with integrins  
6 and other receptors. Full-length uPAR is released from the cell surface, but the mechanism  
7 and functional significance of uPAR release remain obscure. Here we show that  
8 transmembrane glycerophosphodiesterase GDE3 is a GPI-specific phospholipase C that  
9 cleaves and releases uPAR with consequent loss of the proteolytic and non-proteolytic  
10 activities of uPAR. In breast cancer cells, high GDE3 expression depletes endogenous  
11 uPAR resulting in a less transformed phenotype, correlating with higher survival probability  
12 in patients. Our results establish GDE3 as a negative regulator of the uPAR signaling  
13 network and, more generally, highlight GPI-anchor hydrolysis as a cell-intrinsic mechanism  
14 to alter cell behavior.

15

## 16 **Introduction**

17 The urokinase-type plasminogen activator receptor (uPAR) is a central player in a complex  
18 signaling network implicated in a variety of remodeling processes, both physiological and  
19 pathological, ranging from embryo implantation to wound healing and tumor progression (1-  
20 3). uPAR is a glycosylphosphatidylinositol (GPI)-anchored protein and hence lacks intrinsic  
21 signaling capacity. Instead, uPAR acts by binding two major ligands, namely the protease  
22 urokinase plasminogen activator (uPA) and the extracellular matrix (ECM) protein  
23 vitronectin (1,2,4). Through uPA binding, uPAR localizes plasmin generation to the cell  
24 surface and thereby promotes pericellular proteolysis and ECM degradation (1,2). In  
25 addition, through vitronectin binding and functional interactions with integrins and growth  
26 factor receptors, uPAR activates intracellular signaling pathways leading to cytoskeletal  
27 reorganization, enhanced cell adhesion and motility and other features of tissue remodeling  
28 and cell transformation (1,4,5). As such, uPAR is a master regulator of extracellular  
29 proteolysis, cell motility and invasion. uPAR expression is elevated during inflammation and  
30 in many human cancers, where it often correlates with poor prognosis, supporting the view  
31 that tumor cells hijack the uPAR signaling system to enhance malignancy (1-3).

32 It has long been known that full-length uPAR is released from the plasma membrane

33 resulting in a soluble form (suPAR) (6,7), which is detectable in body fluids and considered a  
34 marker of disease severity in cancer and other life-threatening disorders (8-12) . Circulating  
35 suPAR is derived from activated immune and inflammatory cells (1,2), and also from  
36 circulating tumor cells (13). Locally produced suPAR might function as a ligand scavenger to  
37 confer negative feedback on uPAR (1), but suPAR also can undergo proteolytic  
38 fragmentation possibly leading to new signaling activities (14). Yet, despite decades of  
39 research, the mechanism of uPAR release and its physiological implications have been  
40 elusive. A GPI-specific phospholipase D (GPI-PLD) (15) has often been assumed to mediate  
41 the cleavage and release of GPI-anchored proteins, but this unique PLD does not function  
42 on native membranes and normally acts intracellularly during GPI biosynthesis (16).

43 A possible clue to the mechanism of uPAR release comes from recent studies  
44 showing that a member of the glycerophosphodiester phosphodiesterase (GDPD/GDE)  
45 family (17), termed GDE2, promotes neuronal differentiation by cleaving select GPI-  
46 anchored proteins, notably a Notch ligand regulator and heparan sulfate proteoglycans (18-  
47 20). GDE2, along with GDE3 and GDE6, belongs to a GDE subfamily characterized by six-  
48 transmembrane-domain proteins with a conserved catalytic ectodomain (**Fig. 1a**) (19,21).  
49 GDE2's closest relative, GDE3, accelerates osteoblast differentiation through an unidentified  
50 mechanism (21,22), while the function of GDE6 is unknown.

51 Here we report that GDE3 is the long-sought phospholipase that cleaves and  
52 releases uPAR with consequent loss of its proteolytic and non-proteolytic activities.

53

## 54 **Results and Discussion**

55 We set out to determine whether uPAR can be released by any of the three GDE family  
56 members, GDE2, GDE3 and GDE6. When expressed at relatively low levels in HEK293  
57 cells, the GDEs localized to distinct microdomains at the plasma membrane, possibly  
58 representing clustered lipid rafts where GPI-anchored proteins normally reside (23), as well  
59 as to filopodia-like extensions (**Suppl. Fig. 1a-c** and ref. (19)). To assess GDE activity, we  
60 generated stable uPAR-expressing HEK293 cells (HEK-uPAR cells), expressed the  
61 respective GDEs and examined the appearance of suPAR in the medium, using bacterial  
62 phospholipase C (PI-PLC) as a control (19). Strikingly, uPAR was readily released into the

63 medium by GDE3, but not by GDE2 and GDE6 (**Fig. 1b** and **Suppl. Fig. 2a**), thereby  
64 depleting the PI-PLC-sensitive uPAR pool at the plasma membrane (**Fig. 1d** and **Suppl. Fig.**  
65 **2b**). A transmembrane version of uPAR (uPAR-TM) lacking the GPI moiety (24) was  
66 resistant to GDE3 attack, consistent with GDE3 acting through GPI-anchor hydrolysis  
67 (**Suppl. Fig. 2c**). Furthermore, mutating putative active-site residue H229, corresponding to  
68 H233 in GDE2 (19), abolished GDE3 activity (**Fig. 1c**). Depletion of the GPI-anchored uPAR  
69 pool by GDE3 was most prominently observed at the ventral plasma membrane, as revealed  
70 by TIRF microscopy (**Fig. 1e**).

71 To understand the structural basis of the marked GDE substrate selectivity, we  
72 constructed homology-based models of the globular  $\alpha/\beta$  barrel GDPD domains, using I-  
73 TASSER (25). We reasoned that the catalytic domains must recognize not only the PI lipid  
74 moiety at the membrane-water interface, but also the attached protein. While GDE2 and  
75 GDE3 have a similar putative GPI-binding groove close to the active site, they show striking  
76 differences in their surface charge distribution, particularly at the putative substrate  
77 interaction surface (**Fig. 1f**). It therefore seems likely that surface properties are a major  
78 determinant of selective substrate recognition by GDEs, a notion that should be validated by  
79 future structural studies.

80 We asked whether GDE3 cleaves uPAR in *cis* or in *trans*, or both. By mixing GDE3-  
81 expressing cells (lacking uPAR) with uPAR-expressing cells (lacking GDE3), we found that  
82 GDE3-expressing cells failed to release uPAR from the GDE3-deficient cell population  
83 (**Suppl. Fig. 2d**). Thus, GDE3 cleaves uPAR on the same plasma membrane, not on  
84 adjacent cells. To determine whether GDE3 acts as a phospholipase C or D to hydrolyze the  
85 GPI-anchor, suPAR was immunoprecipitated from the medium of GDE3-expressing cells  
86 and treated with nitrous acid to cleave the glucosamine-inositol linkage in the GPI core (**Fig.**  
87 **1g**). Subsequent analysis by liquid chromatography-mass spectrometry (LC-MS) revealed  
88 that the acid-treated suPAR samples contained inositol 1-phosphate (**Fig. 1h**). This result  
89 defines GDE3 as a GPI-specific PLC.

90 When compared to uPAR-deficient cells, HEK-uPAR cells showed markedly  
91 increased cell adhesion, loss of intercellular contacts and enhanced spreading with  
92 prominent lamellipodia formation on vitronectin, but not on fibronectin (**Fig. 2**), features of a  
93 Rac-driven motile phenotype, in agreement with previous studies (4,26). Cell spreading

94 coincided with activation of focal adhesion kinase (FAK), indicative of integrin activation (**Fig.**  
95 **2b**). Strikingly, expression of GDE3 largely abolished the uPAR-induced phenotypes and  
96 cellular responses (**Fig. 2a-f**). Catalytically dead GDE3(H229A) had no effect, neither had  
97 overexpressed GDE2 (**Fig. 2f** and results not shown). Thus, by releasing uPAR from the  
98 plasma membrane, GDE3 suppresses the vitronectin-dependent activities of uPAR.  
99 Treatment of diverse cell types with suPAR-enriched conditioned media did not evoke  
100 detectable cellular responses, supporting the notion that suPAR is biologically inactive, at  
101 least under cell culture conditions.

102 We next assessed the impact of GDE3 on endogenous uPAR activity in MDA-MB-  
103 231 in triple-negative breast cancer cells. These cells express relatively high levels of uPAR  
104 (**Fig. 3a** and **Suppl. Fig. 3a**) and its ligand uPA (27), thus forming an autocrine signaling  
105 loop. GDE3 expression is relatively low in human cancer cell lines, including breast cancer  
106 lines (n=51) (28). We overexpressed GDE3 in MDA-MB-231 cells, confirmed its localization  
107 to the plasma membrane (**Suppl. Fig. 3b**) and examined its impact. Wild-type cells adopted  
108 a motile phenotype on vitronectin (but not on fibronectin), as evidenced by increased cell  
109 spreading with marked lamellipodia formation (**Fig. 3b-d**), strongly reminiscent of a uPAR-  
110 regulated phenotype. Overexpression of GDE3 led to a marked loss of uPAR protein from  
111 the cells, without affecting uPAR mRNA levels (**Fig. 3a**), and abolished the vitronectin-  
112 dependent phenotype (**Fig. 3,b-d**). No effect was observed upon GDE2 overexpression  
113 (data not shown). To confirm that GDE3 acts through uPAR depletion, we expressed non-  
114 cleavable uPAR-TM to compete out endogenous uPAR, and found that GDE3-induced cell  
115 spreading on vitronectin was largely inhibited (**Fig. 3c**). Furthermore, RNAi-mediated  
116 knockdown of uPAR (**Fig. 3e**) gave rise to the same phenotype as GDE3 overexpression,  
117 namely reduced cell adhesion, spreading and lamellipodia formation on vitronectin (**Fig. 3f-**  
118 **h**). In long-term assays, wild-type MDA-MB-231 cells showed marked scattering, indicative  
119 of increased cell motility with loss of intercellular contacts (**Fig. 4a**). Again, GDE3  
120 overexpression mimicked uPAR depletion in greatly reducing both cell motility and  
121 clonogenic potential (**Fig. 4a,b**).

122 Having shown that GDE3 suppresses the non-proteolytic activities of uPAR, we next  
123 examined how GDE3 affects uPAR-driven proteolytic matrix degradation. Also in this case,  
124 GDE3 overexpression mimicked uPAR knockdown in inhibiting the degradation of a gelatin

125 matrix (**Fig. 4c,d**). We therefore conclude that GDE3 attenuates the transformed phenotype  
126 of uPAR-positive breast cancer cells through loss of functional uPAR. Interestingly, high  
127 expression of GDE2 (encoded by *GDPD2*) was found to be associated with improved  
128 relapse-free survival in breast cancer, particularly in triple-negative subtype patients (**Fig.**  
129 **4e**). No such correlation was found for GDE2. These results are consistent with the cell-  
130 based data; however, we cannot rule out that GDE3 may cleave additional GPI-anchored  
131 substrates whose functional loss could contribute to positive clinical outcome.

132 In conclusion, our results reveal GDE3 as the long-sought cell-intrinsic GPI-PLC that  
133 releases uPAR, and establish GDE3 as a negative regulator of the uPAR signaling network  
134 (**Fig. 4f**). Thus, depending on its expression level, GDE3 is predicted to downregulate  
135 normal uPAR-dependent remodeling processes. Indeed, upregulated GDE3 accelerates  
136 osteoblast differentiation (21,22) in a manner resembling the uPAR knockout phenotype  
137 (29). Furthermore, a striking >200-fold upregulation of *GDPD2* is observed during blastocyst  
138 formation (30), implicating GDE3 in the invasion of pre-implantation embryos, a known  
139 uPA/uPAR-dependent process (31). Although correlative, these results support the view that  
140 GDE3 is upregulated to downregulate uPAR activity. The present findings also imply that  
141 circulating suPAR should be regarded as a marker of GDE3 activity, not necessarily  
142 reflecting uPAR expression levels.

143 It will now be important to determine how GDE3 expression and activity are regulated  
144 and, furthermore, to explore the substrate selectivity of GDEs in further detail. When  
145 regarded in a broader context, the present and previous findings (18-20) support the view  
146 that vertebrate GDEs have evolved to modulate key signaling pathways and alter cell  
147 behavior through selective GPI-anchor cleavage.

148

149

## Materials and Methods

**Cell culture and materials.** HEK293, MDA-MB-231 and MCF-7 cells, obtained from the ATCC, were grown in Dulbecco's modified Eagle's medium (DMEM) supplemented with 10% fetal bovine serum (FBS) and antibiotics at 37 °C under 5% CO<sub>2</sub>. Antibodies used: anti-mCh and anti-GFP, home-made; anti-Flag, M2, anti-Vinculin and  $\beta$ -Actin (AC-15) from Sigma; anti-uPAR (MAB807) from R&D systems; anti-FAK(pTyr397) from Thermo Fisher. Vitronectin, fibronectin, inositol 1-phosphate (dipotassium salt) and inositol were purchased from Sigma-Aldrich. *B. cereus* PI-PLC was from Molecular Probes. Phalloidin red (actin-stain™ 647 phalloidin) and green (actin-stain™ 488 phalloidin) were from Cytoskeleton. GM6001 was from Millipore.

**Expression vectors.** GDE3 cDNA was amplified by PCR and subcloned into a pcDNA3-HA plasmid using AfIII/HpaI (PCR product) and AfIII/EcoRV (plasmid) restriction sites. GDE3 was recloned into a pcDNA3(-mCherry) construct by PCR amplification with restriction sites Pml1/Xba1, followed by vector digestion using EcoRV/Xba1. All constructs were tagged on the C-terminus unless otherwise stated. Mutant GDE3(H229A) was generated by amplification with oligos containing the mutation, followed by Dpn1 digestion of the template. The viral plasmids (pBABE-GDE3-mCh, pBABE-uPAR-GFP) were constructed by subcloning the GDE3-pcDNA3 and uPAR-GFP-pEGFP-N1 into a pBABE plasmid. GDE3-mCherry-pcDNA3 was cut using PmeI followed by digestion of the pBABE backbone with SnaBI. uPAR-GFP-pEGFP-N1 was cut with BglII and HpaI and ligated into the pBABE vector, digested with BAMHI and SnaBI. Constructs uPAR-GFP, uPAR-FLAG and uPAR-TM were previously described(24). Human GDE2 cDNA was subcloned as described(19). GDE2-FLAG constructs were provided by Dr. Sungjin Park.

**Transfections and knockdown.** Cells stably expressing uPAR-GFP or GDE3-mCherry were generated using retroviral transduction and subsequent selection with puromycin. Transient transfections were done using the calcium phosphate protocol or XtremeGene 9 agent (Roche). Stable uPAR knockdown in MDA-MB-231 cells was achieved using shRNAs in a lentiviral pLKO vector; five shRNAs from three RC human shRNA library were tested: TRCN0000052637, TRCN0000052636, TRCN0000052634, TRCN0000052633 and TRCN0000052635. The latter two were used for experiments; sequences: CCGGCCCATGAATCAATGTC TGGTACTCGAGTACCAGACATTGATTCATGGGTTTTTTG and CGGGCTTGAAGA TCACCAGCCTTACTCGAGTAAGGCTGGTGATCTTCAAGCTTTTTT, respectively. For virus production, HEK293T cells were transiently transfected using calcium phosphate, and virus particles were collected 48 hr thereafter. uPAR knockdown cells were selected in medium containing 2  $\mu$ g/ml puromycin.

**Liquid chromatography-mass spectrometry (LC-MS).** To determine the inositol phosphate content of cleaved uPAR, suPAR was immuno-precipitated from HEK293 cell conditioned medium using anti-GFP beads (ChromoTek). To remove inositol phosphate from suPAR, the beads were treated with 0.1M acetate buffer (pH 3.5) and subsequently with 0.5M NaNO<sub>2</sub> or 0.5M NaCl (Control) for 3 hrs as previously described (32). Inositol phosphate-containing samples were preprocessed by adding methanol to a final concentration of 70% and shaken at 1000 RPM at room temperature for 10 minutes. Following centrifugation (20,400 x g at 4 °C for 10 min), the supernatant was evaporated to dryness in a Speedvac at room temperature. The dried extracts were reconstituted in 50 mM ammonium acetate (pH 8.0), centrifuged (20,400 x g at 4 °C for 10 min) and transferred to autosampler vials. Liquid chromatography (LC) was performed using a Dionex Ultimate 3000 RSLCnano system (Thermo Fisher Scientific). A volume of 5  $\mu$ l was injected on a Zorbax HILIC PLUS

column (150 x 0.5 mm, 3.0  $\mu$ m particles) maintained at 30 °C. Elution was performed using a gradient: (0-5 min, 20% B; 5-45 min 20-100% B; 45-50 min 100% B; 50-50.1 min 20% B; 50.1-60 min 20% B) of 100% acetonitrile (mobile phase A) and 50 mM ammonium acetate adjusted to pH 8.0 with ammonium hydroxide (mobile phase B) at a flow rate of 15  $\mu$ l/min. Inositol 1-phosphate was detected with an LTQ-Orbitrap Discovery mass spectrometer (Thermo Fisher Scientific) operated in negative ionization mode scanning from  $m/z$  258 to 260 with a resolution of 30,000 FWHM. Electrospray ionization was performed with a capillary temperature set at 300 °C and the sheath, auxiliary and sweep gas flow set at 17, 13 and 1 arbitrary units (AU), respectively. Setting for Ion guiding optics were: Source voltage: 2.4 kV, capillary voltage: -18 V, Tube Lens: -83 V, Skimmer Offset: 0 V, Multipole 00 Offset: 5 V, Lens 0: 5 V, Multipole 0 Offset: 5.5 V, Lens 1: 11 V, Gate Lens Offset: 68 V, Multipole 1 Offset: 11.5 V, Front Lens: 5.5 V. Data acquisition was performed using Xcalibur software (Thermo Fisher Scientific). Reference inositol phosphate (Sigma) was used to determine the retention on the Zorbax HILIC plus column. After applying Xcalibur's build-in smoothing algorithm (Boxcar, 7), extracted ion chromatograms ( $m/z$  259.02-259.03) were used to semi-quantitatively determine inositol phosphate levels.

**Cell adhesion and spreading.** 48-well plates were coated overnight at 4°C with fibronectin (10  $\mu$ g/ml) or vitronectin (5  $\mu$ g/ml), or left untreated. Thereafter, plates were blocked for 2 hr at 37°C using 0.5% BSA in PBS. Cells were washed and harvested in serum-free DMEM supplemented with 0.1% BSA. Equal numbers of cells were seeded and allowed to adhere for 1 hr. Non-adherent cells were washed away using PBS. Attached cells were fixed with 4% paraformaldehyde (PFA) for 10 min, followed by washing and staining with Crystal violet (5 mg/ml in 2% ethanol) for 10 min. After extensive washing, cells were dried and lysed in 2% SDS for 30 min. Quantification was done by measuring absorbance at 570 nm using a plate reader. For cell-matrix contact area and lamellipodia measurements, coverslips were coated overnight with fibronectin or vitronectin and washed twice with PBS. Cells were trypsinized, washed and resuspended in DMEM and left to adhere and spread for 4 hr. After fixation (4% PFA) and F-actin staining with phalloidin, images were taken using confocal microscopy. Cell and lamellipodia area was quantified using an ImageJ macro.

**Cell scattering and colony formation.** Cell scattering was determined as described (27). In brief, single MDA-MB-231 cells were allowed to grow out as colonies, and the area covered by the scattered colonies (colony size) was measured at 6 days after plating. For measuring colony outgrowth, 500 cells were plated and colonies were counted after 14 days.

**Matrix degradation.** Coverslips were coated with OG-labelled gelatin (Invitrogen) supplemented with vitronectin (5  $\mu$ g/ml). About 100,000 cells per coverslip were seeded in DMEM with 10% FCS. After 20 hrs, cells were washed, fixed with 4% PFM and stained with phalloidin-Alexa647 (Invitrogen). Gelatin degradation was determined from confocal images of >15 randomly chosen fields of view per coverslip (testing at least two coverslips / condition on two separate days: total four coverslips per condition). The images were randomized and the area of degradation was normalized to the total area of cells or to the number of cells.

**RT-qPCR.** Total RNA was isolated using the GeneJET purification kit (Fermentas). cDNA was synthesized by reverse transcription from 2  $\mu$ g RNA with oligodT 15 primers and SSII RT enzyme (Invitrogen). Relative qPCR was measured on a 7500 Fast System (Applied Biosystems) as follows: 95 °C for 2 min followed by 40 cycles at 95 °C for 15 sec followed by 60 °C for 1 min. 200 nM forward and reverse primers, 16  $\mu$ l SYBR Green Supermix (Applied Biosystems) and diluted cDNA were used in the final reaction mixture. GAPDH was used as reference gene and milliQ was used as negative



control. Normalized expression was calculated following the equation  $NE=2^{(Ct_{target}-Ct_{reference})}$ . Primers used: GDE3, forward TCAGCAGGACCACGAATGTA, reverse GCTGCAGCTTCCTCCAATAG; uPAR, forward AATGGCCGCCAGTGTACAG, reverse CAGGAGACATCAATGTGGTTC; Cyclophilin, forward CATCTGCACTGCCAAGACTGA, reverse TTGCCAAACACCACATGCTT.

**Western blotting.** For Western blotting, cells were washed with cold PBS, lysed in RIPA buffer supplemented with protease inhibitors and spun down. Protein concentration was measured using a BCA protein assay kit (Pierce) and LDS sample buffer (NuPAGE, Invitrogen) was added to the lysate or directly to the medium. Equal amounts were loaded on SDS-PAGE pre-cast gradient gels (4-12% Nu-Page Bis-Tris, Invitrogen) followed by transfer to nitrocellulose membrane. Non-specific protein binding was blocked by 5% skimmed milk in TBST; primary antibodies were incubated overnight at 4° C in TBST with 2% skimmed milk. Secondary antibodies conjugated to horseradish peroxidase (DAKO, Glostrup, Denmark) were incubated for 1 hr at room temperature; proteins were detected using ECL Western blot reagent.

**Microscopy.** Cells cultured on 24 mm, #1,5 coverslips were washed and fixed with 4% PFA, permeabilized with 0.1% Triton X-100 and blocked with 2% BSA for 1 hr. Incubation with primary antibodies was done for 1 hr followed by incubation with Alexa-conjugated antibodies or Phalloidin for 45 min at room temperature. For confocal microscopy, cells were washed with PBS, mounted with Immuno-Mount™ (Thermo Scientific) and visualized on a LEICA TCS-SP5 confocal microscopy (63 x objective). Super-resolution imaging was done using a SR-GSD Leica microscope equipped with an oxygen scavenging system, as previously described (19). In short, 15000 frames were taken in TIRF mode, at 10 ms exposure time. After post image analysis, movies were analyzed and corrected using the ImageJ plugin Thunderstorm (<http://imagej.nih.gov/ij/>) followed by correction with an ImageJ macro using the plugin Image Stabilizer. For Total Internal Reflection (TIRF) microscopy, HEK293 cells stably expressing UPAR-GFP and transiently transfected with GDE3-mCherry were imaged using a Leica AM TIRF MC microscope with a HCX PL APO 63x, 1.47 NA oil immersion lens. Excitation was at 488 and 561 nm and detection of fluorescence emission was by a GR filter cube (Leica). Before each experiment, automatic laser alignment was carried out and TIRF penetration depth was set to 200 nm. Data were acquired at 500 ms frame rate.

**Flow cytometry.** HEK293 cells stably expressing uPAR-GFP were left untreated, treated with PI-PLC or transiently transfected with GDE3-mCherry. Cells were trypsinized, blocked in 2%BSA and stained with rabbit anti-GFP primary antibody followed by AlexaFluor-647 coupled anti-rabbit secondary antibody. Cells were analyzed using a BD LSR Fortessa flow cytometer.

**Statistical analysis.** For all single comparisons, a two tailed unpaired Student's t-test was used; for multiple comparisons an ordinary ANOVA with Tukey's test. A *P* value <0.05 was considered statistically significant. Error bars shown in the bar diagrams were calculated as the standard error of the mean (SEM); whiskers in the box plots depict 95% confidence intervals.

**Acknowledgements.** We thank Sungjin Park and Shantini Sockanathan (Johns Hopkins University School of Medicine, Baltimore, USA) for reagents and fruitful discussions. This work was supported by the Netherlands Organisation for Scientific Research (NWO) and the Dutch Cancer Society (KWF).

**Competing Interests.** The authors declare no competing financial interests.

## References

1. Smith, H. W., and Marshall, C. J. (2010) Regulation of cell signalling by uPAR. *Nat Rev Mol Cell Biol* **11**, 23-36
2. Ferraris, G. M., and Sidenius, N. (2013) Urokinase plasminogen activator receptor: a functional integrator of extracellular proteolysis, cell adhesion, and signal transduction. *Seminars in thrombosis and hemostasis* **39**, 347-355
3. Boonstra, M. C., Verspaget, H. W., Ganesh, S., Kubben, F. J., Vahrmeijer, A. L., van de Velde, C. J., Kuppen, P. J., Quax, P. H., and Sier, C. F. (2011) Clinical applications of the urokinase receptor (uPAR) for cancer patients. *Current pharmaceutical design* **17**, 1890-1910
4. Madsen, C. D., Ferraris, G. M., Andolfo, A., Cunningham, O., and Sidenius, N. (2007) uPAR-induced cell adhesion and migration: vitronectin provides the key. *J Cell Biol* **177**, 927-939
5. Ferraris, G. M., Schulte, C., Buttiglione, V., De Lorenzi, V., Piontini, A., Galluzzi, M., Podesta, A., Madsen, C. D., and Sidenius, N. (2014) The interaction between uPAR and vitronectin triggers ligand-independent adhesion signalling by integrins. *The EMBO journal* **33**, 2458-2472
6. Ploug, M., Eriksen, J., Plesner, T., Hansen, N. E., and Dano, K. (1992) A soluble form of the glycolipid-anchored receptor for urokinase-type plasminogen activator is secreted from peripheral blood leukocytes from patients with paroxysmal nocturnal hemoglobinuria. *European journal of biochemistry / FEBS* **208**, 397-404
7. Pedersen, N., Schmitt, M., Ronne, E., Nicoletti, M. I., Hoyer-Hansen, G., Conese, M., Giavazzi, R., Dano, K., Kuhn, W., and Janicke, F. (1993) A ligand-free, soluble urokinase receptor is present in the ascitic fluid from patients with ovarian cancer. *The Journal of clinical investigation* **92**, 2160-2167
8. Haupt, T. H., Petersen, J., Ellekilde, G., Klausen, H. H., Thorball, C. W., Eugen-Olsen, J., and Andersen, O. (2012) Plasma suPAR levels are associated with mortality, admission time, and Charlson Comorbidity Index in the acutely admitted medical patient: a prospective observational study. *Critical care* **16**, R130
9. Sidenius, N., Sier, C. F., Ullum, H., Pedersen, B. K., Lepri, A. C., Blasi, F., and Eugen-Olsen, J. (2000) Serum level of soluble urokinase-type plasminogen activator receptor is a strong and independent predictor of survival in human immunodeficiency virus infection. *Blood* **96**, 4091-4095
10. Hayek, S. S., Quyyumi, A. A., and Reiser, J. (2016) Soluble Urokinase Receptor and Chronic Kidney Disease. *The New England journal of medicine* **374**, 891
11. Stephens, R. W., Nielsen, H. J., Christensen, I. J., Thorlacius-Ussing, O., Sorensen, S., Dano, K., and Brunner, N. (1999) Plasma urokinase receptor levels in patients with colorectal cancer: relationship to prognosis. *Journal of the National Cancer Institute* **91**, 869-874
12. Shariat, S. F., Roehrborn, C. G., McConnell, J. D., Park, S., Alam, N., Wheeler, T. M., and Slawin, K. M. (2007) Association of the circulating levels of the urokinase system of plasminogen activation with the presence of prostate cancer and invasion, progression, and metastasis. *J Clin Oncol* **25**, 349-355
13. Mustjoki, S., Sidenius, N., Sier, C. F., Blasi, F., Elonen, E., Alitalo, R., and Vaheri, A. (2000) Soluble urokinase receptor levels correlate with number of circulating tumor cells in acute myeloid leukemia and decrease rapidly during chemotherapy. *Cancer research* **60**, 7126-7132
14. Montuori, N., and Ragno, P. (2009) Multiple activities of a multifaceted receptor: roles of cleaved and soluble uPAR. *Front Biosci (Landmark Ed)* **14**, 2494-2503
15. Scallon, B. J., Fung, W. J., Tsang, T. C., Li, S., Kado-Fong, H., Huang, K. S., and Kochan, J. P. (1991) Primary structure and functional activity of a phosphatidylinositol-glycan-specific phospholipase D. *Science* **252**, 446-448
16. Mann, K. J., Hepworth, M. R., Raikwar, N. S., Deeg, M. A., and Sevlever, D. (2004) Effect of glycosylphosphatidylinositol (GPI)-phospholipase D overexpression on GPI metabolism. *The Biochemical journal* **378**, 641-648
17. Corda, D., Mosca, M. G., Ohshima, N., Grauso, L., Yanaka, N., and Mariggio, S. (2014) The emerging physiological roles of the glycerophosphodiesterase family. *The FEBS journal* **281**, 998-1016

18. Park, S., Lee, C., Sabharwal, P., Zhang, M., Meyers, C. L., and Sockanathan, S. (2013) GDE2 promotes neurogenesis by glycosylphosphatidylinositol-anchor cleavage of RECK. *Science* **339**, 324-328
19. Matas-Rico, E., van Veen, M., Leyton-Puig, D., van den Berg, J., Koster, J., Kedziora, K. M., Molenaar, B., Weerts, M. J., de Rink, I., Medema, R. H., Giepmans, B. N., Perrakis, A., Jalink, K., Versteeg, R., and Moolenaar, W. H. (2016) Glycerophosphodiesterase GDE2 Promotes Neuroblastoma Differentiation through Glypican Release and Is a Marker of Clinical Outcome. *Cancer Cell* **30**, 548-562
20. Matas-Rico, E., van Veen, M., and Moolenaar, W. H. (2016) Neuronal differentiation through GPI-anchor cleavage *Cell cycle in press*
21. Corda, D., Kudo, T., Zizza, P., Iurisci, C., Kawai, E., Kato, N., Yanaka, N., and Mariggio, S. (2009) The developmentally regulated osteoblast phosphodiesterase GDE3 is glycerophosphoinositol-specific and modulates cell growth. *J Biol Chem* **284**, 24848-24856
22. Yanaka, N., Imai, Y., Kawai, E., Akatsuka, H., Wakimoto, K., Nogusa, Y., Kato, N., Chiba, H., Kotani, E., Omori, K., and Sakurai, N. (2003) Novel membrane protein containing glycerophosphodiester phosphodiesterase motif is transiently expressed during osteoblast differentiation. *J Biol Chem* **278**, 43595-43602
23. Maeda, Y., and Kinoshita, T. (2011) Structural remodeling, trafficking and functions of glycosylphosphatidylinositol-anchored proteins. *Prog Lipid Res* **50**, 411-424
24. Cunningham, O., Andolfo, A., Santovito, M. L., Iuzzolino, L., Blasi, F., and Sidenius, N. (2003) Dimerization controls the lipid raft partitioning of uPAR/CD87 and regulates its biological functions. *The EMBO journal* **22**, 5994-6003
25. Yang, J., Yan, R., Roy, A., Xu, D., Poisson, J., and Zhang, Y. (2015) The I-TASSER Suite: protein structure and function prediction. *Nature methods* **12**, 7-8
26. Kjoller, L., and Hall, A. (2001) Rac mediates cytoskeletal rearrangements and increased cell motility induced by urokinase-type plasminogen activator receptor binding to vitronectin. *J Cell Biol* **152**, 1145-1157
27. LeBeau, A. M., Duriseti, S., Murphy, S. T., Pepin, F., Hann, B., Gray, J. W., VanBrocklin, H. F., and Craik, C. S. (2013) Targeting uPAR with antagonistic recombinant human antibodies in aggressive breast cancer. *Cancer research* **73**, 2070-2081
28. Barretina, J., Caponigro, G., Stransky, N., Venkatesan, K., Margolin, A. A., Kim, S., Wilson, C. J., Lehar, J., Kryukov, G. V., Sonkin, D., Reddy, A., Liu, M., Murray, L., Berger, M. F., Monahan, J. E., Morais, P., Meltzer, J., Korejwa, A., Jane-Valbuena, J., Mapa, F. A., Thibault, J., Bric-Furlong, E., Raman, P., Shipway, A., Engels, I. H., Cheng, J., Yu, G. K., Yu, J., Aspesi, P., Jr., de Silva, M., Jagtap, K., Jones, M. D., Wang, L., Hatton, C., Palesscandolo, E., Gupta, S., Mahan, S., Sougnez, C., Onofrio, R. C., Liefeld, T., MacConaill, L., Winckler, W., Reich, M., Li, N., Mesirov, J. P., Gabriel, S. B., Getz, G., Ardlie, K., Chan, V., Myer, V. E., Weber, B. L., Porter, J., Warmuth, M., Finan, P., Harris, J. L., Meyerson, M., Golub, T. R., Morrissey, M. P., Sellers, W. R., Schlegel, R., and Garraway, L. A. (2012) The Cancer Cell Line Encyclopedia enables predictive modelling of anticancer drug sensitivity. *Nature* **483**, 603-607
29. Furlan, F., Galbiati, C., Jorgensen, N. R., Jensen, J. E., Mrak, E., Rubinacci, A., Talotta, F., Verde, P., and Blasi, F. (2007) Urokinase plasminogen activator receptor affects bone homeostasis by regulating osteoblast and osteoclast function. *Journal of bone and mineral research : the official journal of the American Society for Bone and Mineral Research* **22**, 1387-1396
30. Munch, E. M., Sparks, A. E., Gonzalez Bosquet, J., Christenson, L. K., Devor, E. J., and Van Voorhis, B. J. (2016) Differentially expressed genes in preimplantation human embryos: potential candidate genes for blastocyst formation and implantation. *Journal of assisted reproduction and genetics* **33**, 1017-1025
31. Mulhaupt, H. A., Mazar, A., Cines, D. B., Warhol, M. J., and McCrae, K. R. (1994) Expression of urokinase receptors by human trophoblast. A histochemical and ultrastructural analysis. *Laboratory investigation; a journal of technical methods and pathology* **71**, 392-400
32. Mehlert, A., and Ferguson, M. A. (2009) Proteomic scale high-sensitivity analyses of GPI membrane anchors. *Glycoconjugate journal* **26**, 915-921

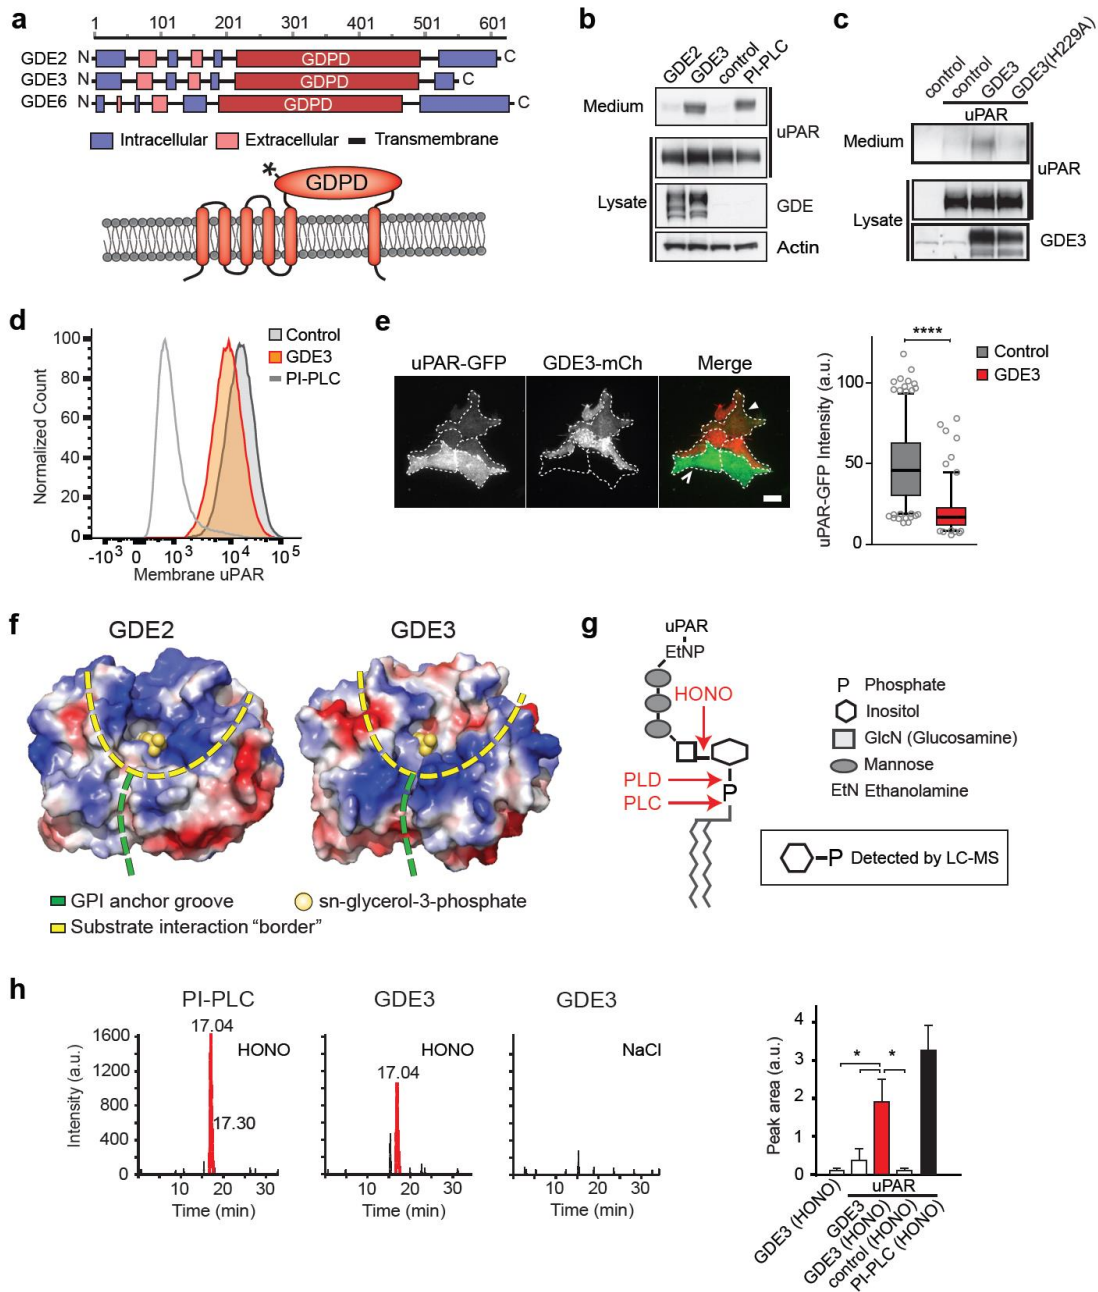

**Figure 1. GDE3 is a GPI-PLC that cleaves and releases uPAR.**

**a**, GDE domain structure and transmembrane scheme of GDE3; asterisk, His229. **b**, Immunoblot analysis of uPAR release into the medium. HEK-uPAR cells transfected with empty vector (control), GDE2 or GDE3. PI-PLC served as positive control. **c**, GDE3(H229A) fails to release uPAR. **d**, **e**, uPAR disappears from the plasma membrane as measured by flow cytometry (**d**) and TIRF microscopy (**e**). Box plot shows uPAR-GFP intensity at the ventral membrane. **f**, Homology modeling of the GDE2 and GDE3 catalytic domains showing surface charge distributions (blue, positive; red, negative; green line, putative GPI-binding groove; yellow line, substrate-binding surface). The active site is indicated by glycerol-3-phosphate located at the template structure. **g**, GPI-anchor with cleavage sites indicated; HONO, nitrous acid. **h**, Representative LC-MS ion chromatograms ( $m/z$  259.02-259.03); inositol 1-phosphate peaks in red. HONO-treated suPAR contains inositol 1-phosphate ( $n=3$ , mean  $\pm$  SEM; \* $P<0.05$  ANOVA).

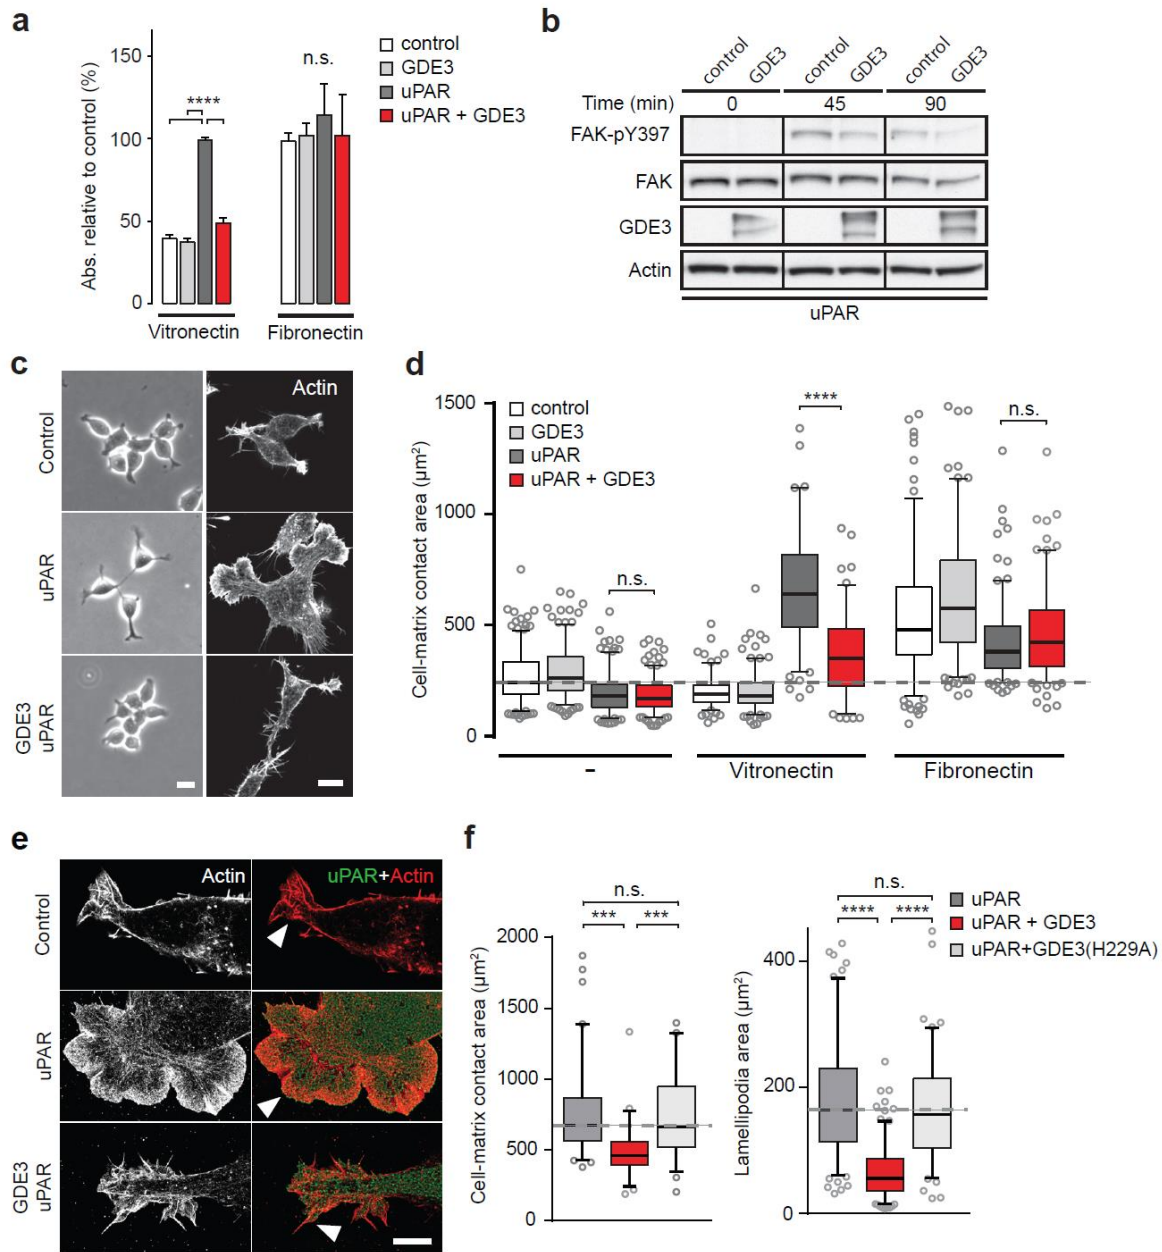

**Figure 2. GDE3 inhibits uPAR activity in HEK-uPAR cells.**

**a**, uPAR confers increased adhesion to vitronectin, but not fibronectin, which is prevented by GDE3 expression ( $n=3$ , mean  $\pm$  SEM), \*\*\*\* $P < 0.0001$ ; n.s., not significant. **b**, GDE3 inhibits FAK activation during cell adhesion. FAK activity was assayed at the indicated times after plating. **c**, GDE3 inhibits uPAR-induced cell spreading, scattering and lamellipodia formation on vitronectin (bar, 10  $\mu\text{m}$ ). **d**, Cell-matrix contact area of cells expressing the indicated constructs plated on either fibronectin or vitronectin. Box plots show the mean of three independent experiments. Dotted line represents the mean of control cells. **e,f**, uPAR-induced lamellipodia on vitronectin disappear upon GDE3 expression, as shown by super-resolution microscopy (**e**) (bar, 5  $\mu\text{m}$ ) and quantified in (**f**). GDE3(H229A) fails to affect lamellipodia formation. \*\*\* $P < 0.0005$ ; \*\*\*\* $P < 0.00005$  of ANOVA.

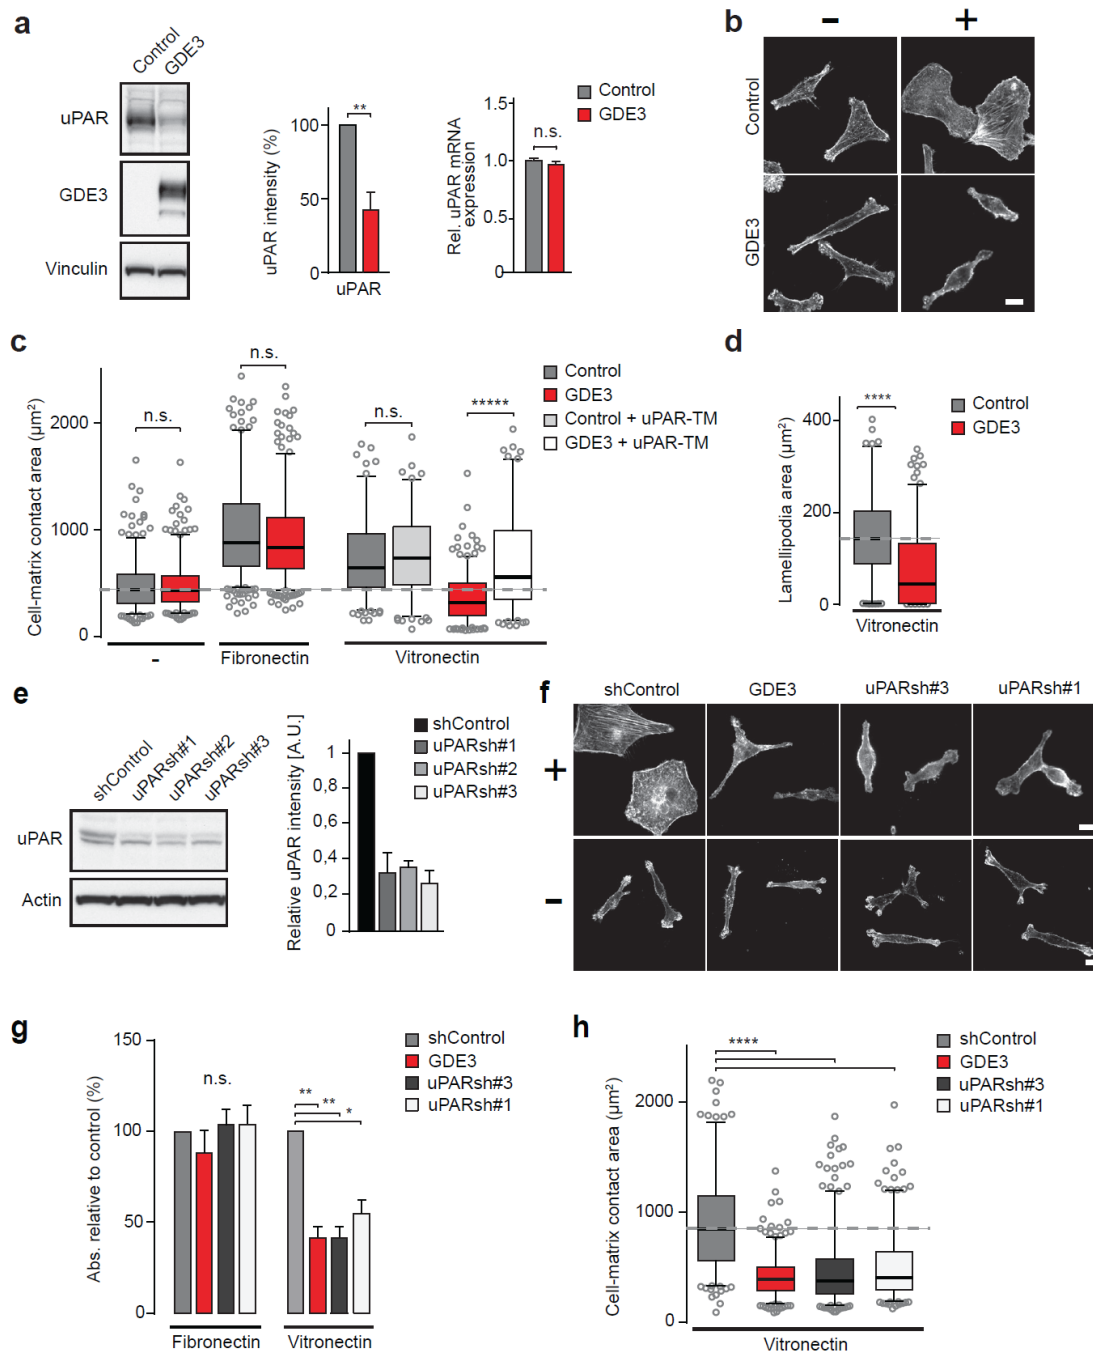

**Figure 3. GDE3 depletes uPAR and suppresses the vitronectin-dependent phenotype of MDA-MB-231 breast cancer cells.**

**a**, GDE3 overexpression decreases uPAR protein but not mRNA expression, as shown by immunoblot and qPCR, respectively ( $n=3$ , mean  $\pm$  SEM). **b**, Confocal images showing that GDE3 inhibits cell spreading and lamellipodia formation on vitronectin (+). Bar, 10  $\mu\text{m}$ . **c,d**, GDE3 reduces cell spreading (**c**) and lamellipodia formation (**d**) on vitronectin, whilst non-cleavable uPAR-TM inhibits GDE3 activity (**c**). **e**, Immunoblot analysis of uPAR knockdown; maximum knockdown was achieved by hairpins #1 and #3. **f,g,h**, GDE3 overexpression phenocopies uPAR knockdown in cells on vitronectin (+); bar, 10  $\mu\text{m}$  (**f**).

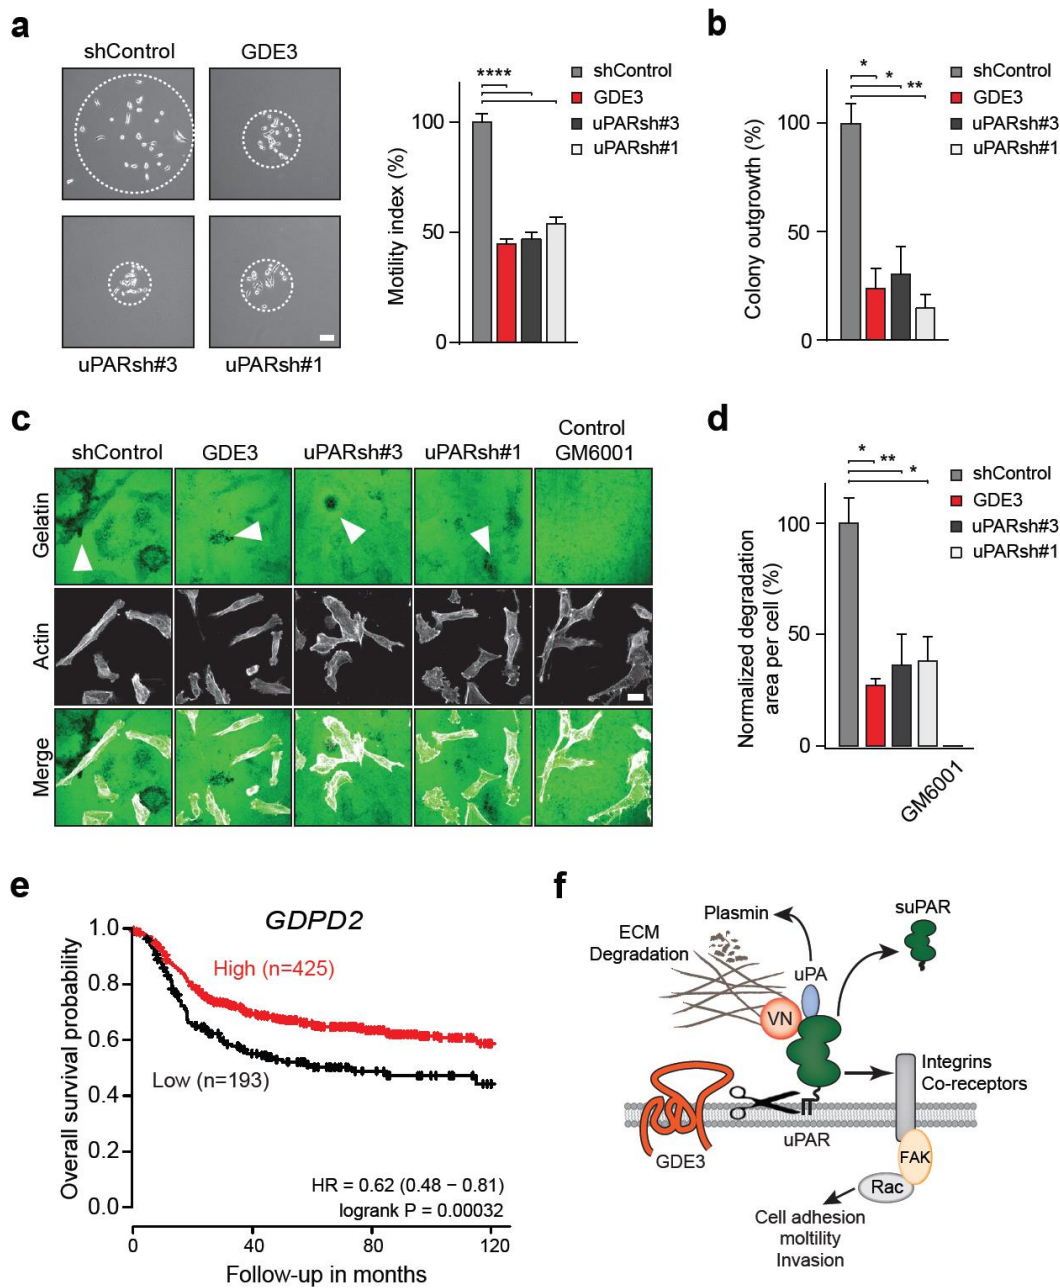

**Figure 4. GDE3 expression attenuates the uPAR-dependent transformed phenotype of breast cancer cells, correlating with higher survival probability.**

**a,b**, GDE3 overexpression in MDA-MB-231 cells mimics uPAR knockdown in inhibiting cell scattering (**a**) and colony formation (**b**). In (**a**), MDA-MB-231 cells grow out as scattered colonies; bar, 100  $\mu$ m.

(n=3, mean  $\pm$  SEM \* \* \*  $P < 0.0005$ ). In (**b**), colonies were counted after 14 days. \*  $P < 0.05$  of ANOVA.

**c,d**, Degradation of a gelatin matrix (bar, 10  $\mu$ m). Arrows point to black spots where gelatin was degraded. Metalloprotease inhibitor GM6001 was used as a control (**c**). Degradation was quantified (**d**) at 20 hrs after plating (mean  $\pm$  SEM \* \* \* \*  $P < 0.0005$  of ANOVA).

**e** High *GDPD2* expression significantly correlates with higher survival rate in triple-negative breast cancer patients (n= 618). HR, hazard ratio with 95% confidence interval. Analysis based on microarray data ([www.kmplot.com](http://www.kmplot.com)). **f** GDE3 cleaves and releases uPAR leading to loss of uPAR function.

## Supplemental Figures 1-3

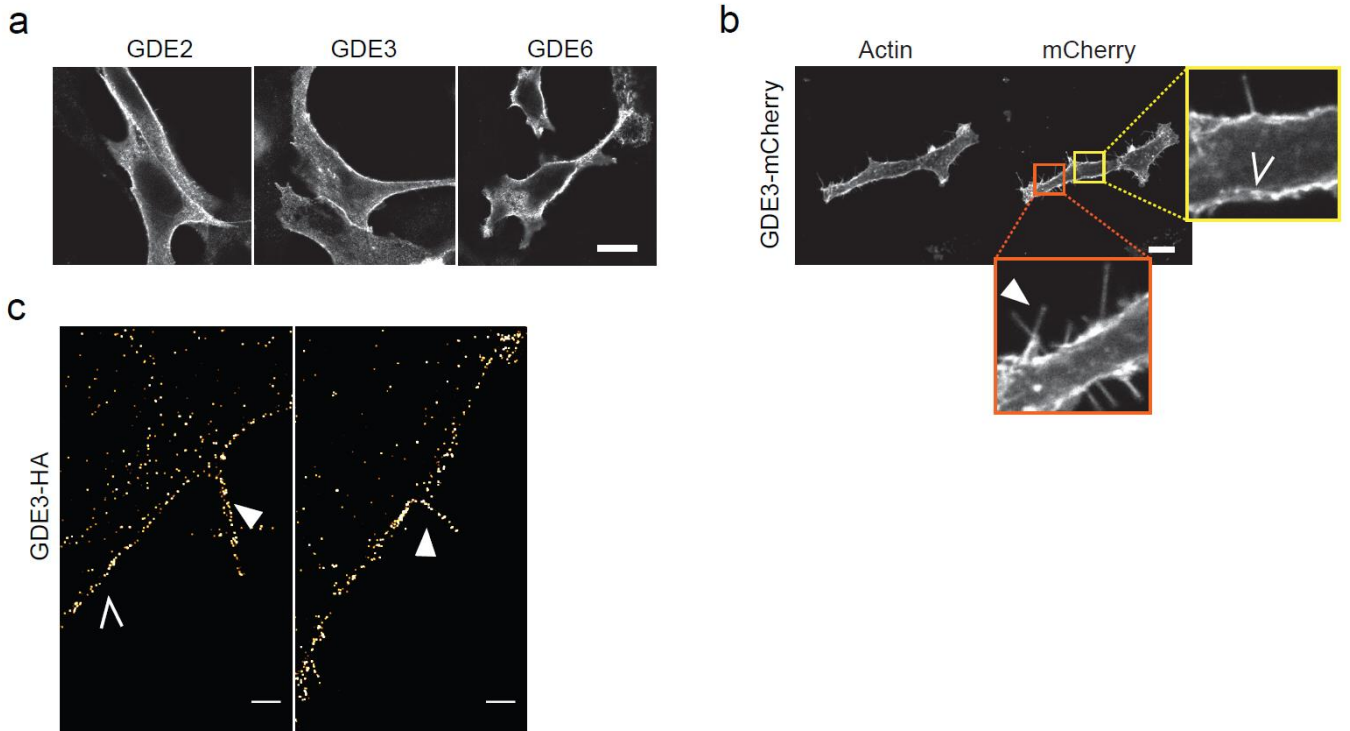

### Supplemental Figure 1. GDE subcellular localization.

**a**, Confocal images of HEK293 cells expressing GDE2-HA, GDE3-HA or GDE6-FLAG; bar, 10  $\mu\text{m}$ .

**b,c**, GDE3 localizes to distinct microdomains (yellow square, open arrows) and filopodia-like extensions (orange square, solid arrow), as visualized by confocal (**b**) and super-resolution (**c**) microscopy.

Phalloidin was used to visualize F-actin. Bars, 10  $\mu\text{m}$  (**a**, **b**) and 1  $\mu\text{m}$  (**c**), respectively.



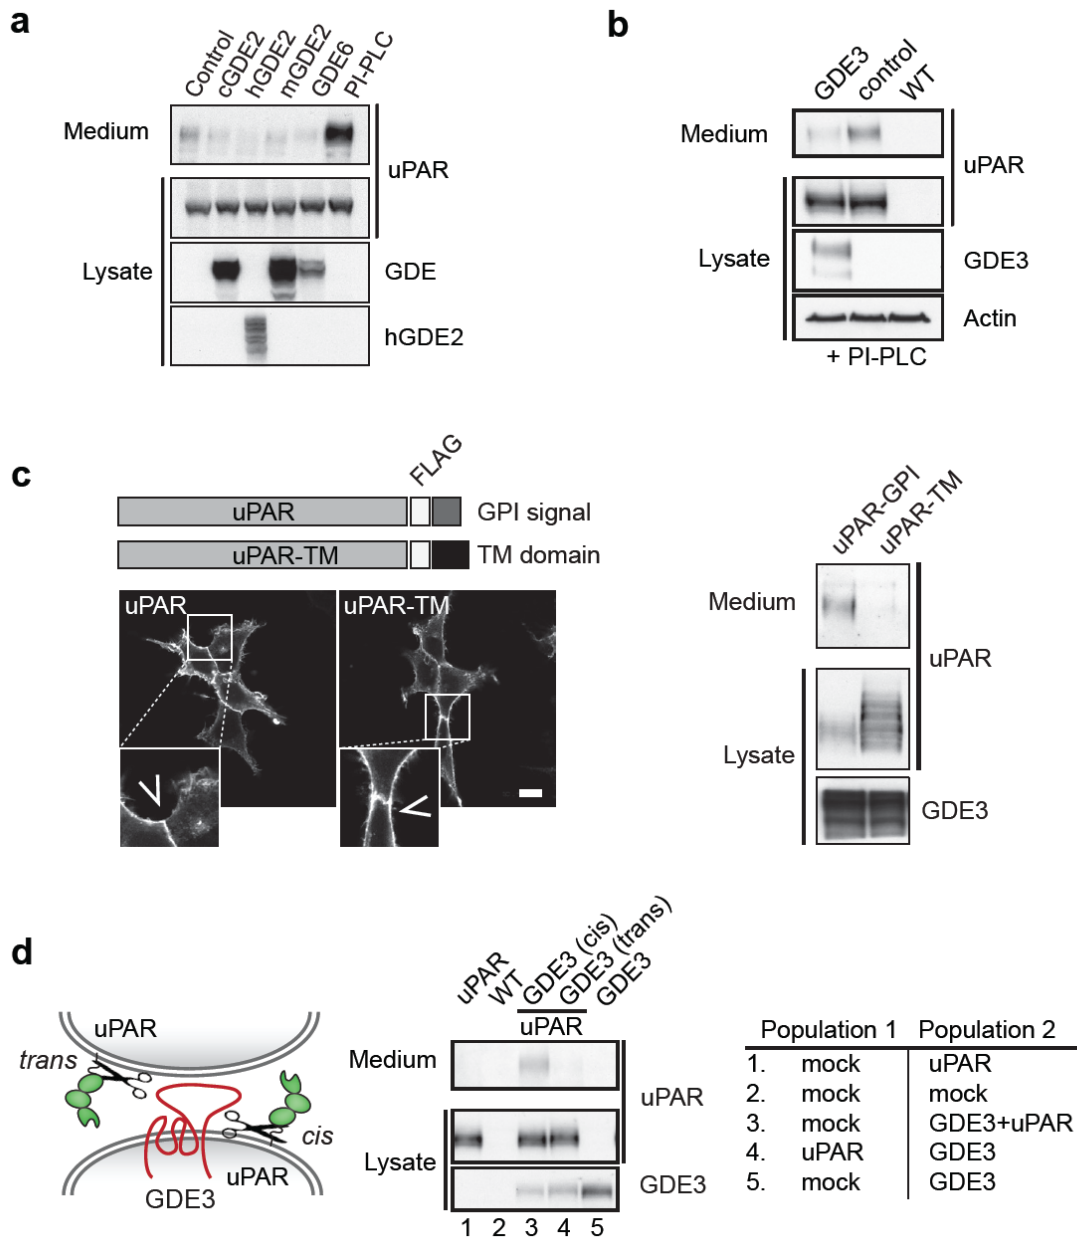

**Supplemental Figure 2. Induction of uPAR release from HEK293-uPAR cells.**

**a**, Immunoblot analysis showing that vertebrate GDE2 (chicken, mouse and human) and GDE6 fail to release uPAR. PI-PLC was used as positive control.

**b**, Immunoblot analysis showing that GDE3 depletes the membrane-anchored uPAR pool. HEK-uPAR cells expressing GDE3 or empty vector (control) were treated with PI-PLC. Right lane refers to wild-type (WT) HEK293 cells.

**c**, uPAR-TM, containing the transmembrane domain of EGFR, is properly expressed at the plasma membrane (bar, 10  $\mu$ m), but is not released by GDE3 as shown by immunoblotting using anti-FLAG antibody.

**d**, (Left) Scheme showing uPAR cleavage in *cis* or *trans*. (Right) GDE3-expressing HEK-uPAR cells were mixed with a GDE3-deficient cell population, as indicated. Immunoblot analysis of uPAR in medium and cell lysates indicates that GDE3 acts in *cis*; mock refers to empty vector-transfected cells.

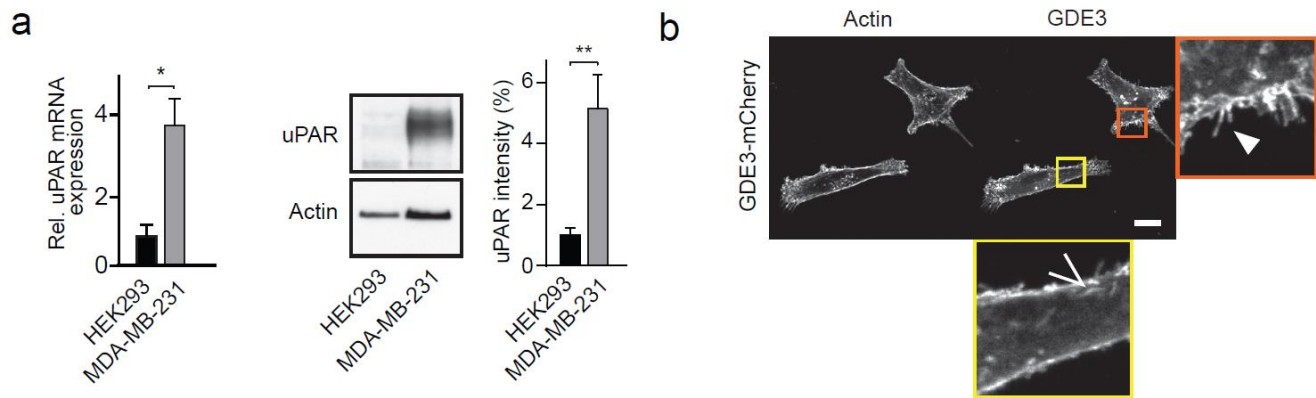

**Supplemental Figure 3. uPAR expression and GDE3 localization in MDA-MB-231 cells.**

**a**, Expression of uPAR protein and mRNA in MDA-MB-231 versus HEK293 cells. \*  $P < 0.05$ ; \*\*  $P < 0.001$  of t-test. **b**, Membrane localization of GDE3-mCh to distinct microdomains and filopodia-like extensions; bar, 10  $\mu\text{m}$ .
